# Supplementary material
Source: publisher figshare collection journal article supplement (https://gsajournals.figshare.com/ndownloader/files/28547721)
Supplement: Supplementary file 1 [file 28547721]

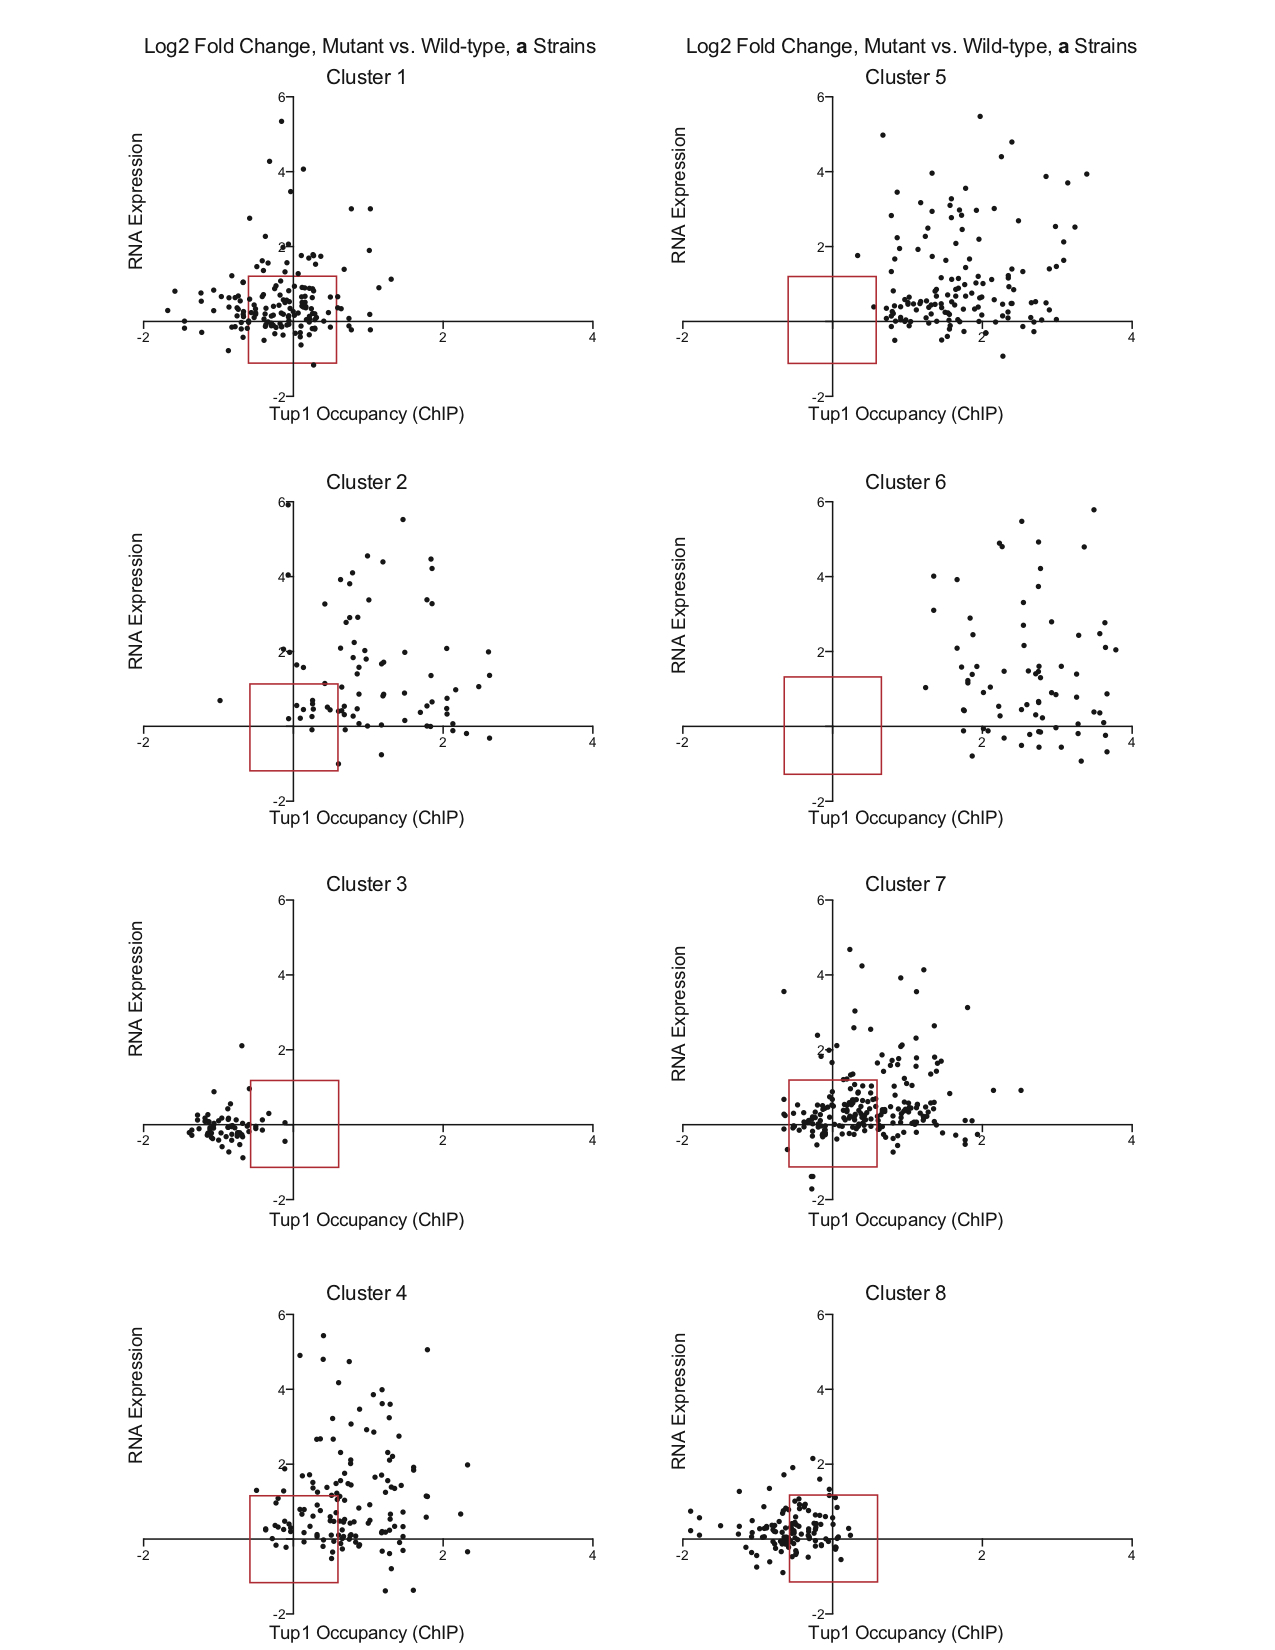


Figure S4. Scatter plots to illustrate Tup1 occupancy vs. RNA expression in *tup1(S649F)* vs. wild-type a strains.

The log2-fold change in ChIP occupancy between Tup1(S649F) and wild-type Tup1 **a** strains was plotted relative to the log2-fold change in RNA-Seq expression levels between *tup1(S649F)* and wild-type. Each dot represents a unique gene / peak combination. The sides of the red squares at the graph origins demarcate 1.5-fold changes in occupancy or expression (log2 = 0.585 or -0.585); points located within the box are those scored as no change, “NC”. Tup1 peaks located between divergent genes were used twice in the analysis, once for each gene. Some genes were counted more than once, due to the presence of multiple Tup1 peaks within their upstream intergenic region (53 genes counted as 118 out of 1039 total genes). In most of these cases, the peaks fall in different cluster categories.
